# Supplementary material for: Extraneous E-Cadherin Engages the Deterministic Process of Somatic Reprogramming through Modulating STAT3 and Erk1/2 Activity
Source: PubMed Central journal article supplement (PMC7912071; doi:10.3390/cells10020284), 2021-01-31
Supplement: cells-10-00284-s001.pdf [file cells-10-00284-s001.pdf]

## Supplement Figures

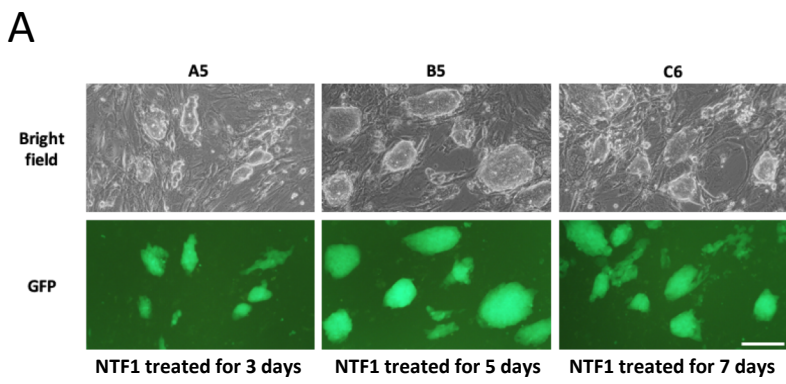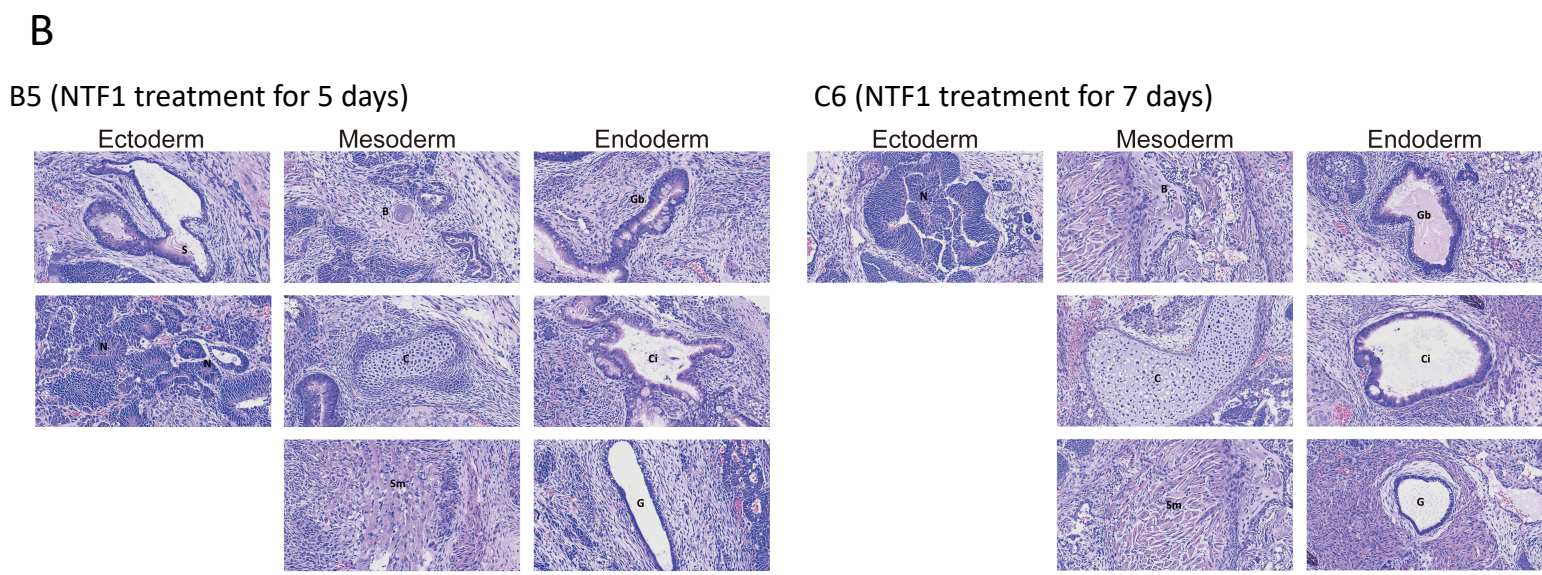

**Figure S1. The NTF1-mediated somatic reprogramming of the  $MEF^{Col1a1\ 4F2A\ Oct4-GFP}$  acquires pluripotency**  
 (A) Representative clonally isolated iPSCs from three-day (A5), five-day (B5), and seven-day (C6) NTF1 treatments. The  $iPSC^{Col1a1\ 4F2A\ Oct4-GFP}$  clones were cultured and maintained with  $\gamma$ DR4 feeder cells in R1 ESC medium. (B) Teratoma formation assays of the iPSC B5 and C6 clones. S: squamous epithelium; N: neuronal rosette; B: bone; C: cartilage; Sm: skeletal muscle; Gb: Gut epithelium with goblet cells; Ci: ciliated respiratory-like epithelium; G: glands. Scale bar denotes 100  $\mu$ m.

## Supplement Tables

Table S1. Quantitative PCR primer list

| Genes  | Forward                                  | Reverse                               |
|--------|------------------------------------------|---------------------------------------|
| Snail1 | 5' -TGT GTC TGC ACG ACC TGT G-3'         | 5' -AGT GGG AGC AGG AGA ATG G-3'      |
| Snail2 | 5' -ACA CAT TGC CTT GTG TCT GC-3'        | 5' -GCC CTC AGG TTT GAT CTG TC-3'     |
| CDH1   | 5' -AAC CCA AGC ACG TAT CAG GG-3'        | 5' -GAG TGT TGG GGG CAT CAT CA-3'     |
| Thy1   | 5' -TCG CTC TCC TGC TCT CAG TC-3'        | 5' -TTA TTC TCA TGG CGG CAG TC-3'     |
| Oct4   | 5' -ACA TCG CCA ATC AGC TTG G-3'         | 5' -AGA ACC ATA CTC GAA CCA CAT CC-3' |
| Sox2   | 5' -ACA GAT GCA ACC GAT GCA CC-3'        | 5' -TGG AGT TGT ACT GCA GGG CG-3'     |
| Nanog  | 5' -CCA GGT TCC TTC CTT CTT CC-3'        | 5' -GGT GAG ATG GCT CAG TGG AT-3'     |
| Rex1   | 5' -ACG GAT ACC TAG AGT GCA TCA TAC G-3' | 5' -TTG CTC CAC TTC CTC CAA GCT-3'    |
| Esrrb  | 5' -TTT CTG GAA CCC ATG GAG AG-3'        | 5' -AGC CAG CAC CTC CTT CTA CA-3'     |
| Dppa3  | 5' -CTG AAA GAC CCT ATA GCA AAG A-3'     | 5' -CTC ACT GTC CCG TTC AAA CTC A-3'  |
| LIF r  | 5' -AGA AGA ACT GGC TCC CAT TG-3'        | 5' -GGA TGT CGT CCC ATT TCA CT-3'     |
| GP130  | 5' -ATA GTC GTG CCT GTG TGC TTA-3'       | 5' -GGT GAC CAC TGG GCA ATA TG-3'     |
| GAPDH  | 5' -GAA AGC TGT GGC GTG AT-3'            | 5' -TCC ACG ACG GAC ACA TT-3'         |
